# Supplementary material for: Bio-template assisted synthesis of porous glutaraldehyde-polyethyleneimine particulate resin for selective copper ion binding and recovery
Source: PubMed Central journal article supplement — RSC Adv. 2018 Mar 28;8(22):12043–52. doi: 10.1039/c8ra00454d (PMC9079264; doi:10.1039/c8ra00454d), 2018-03-28
Supplement: RA-008-C8RA00454D-s001.pdf [file RA-008-C8RA00454D-s001.pdf]

1

## Supplementary information

2 Bio-template assisted synthesis of porous glutaraldehyde-  
3 polyethyleneimine particulate resin for selective copper ion binding and  
4 recovery

5

6 Simarpreet Kaur<sup>a</sup>, Ivan Kempson<sup>a,\*</sup>, Haolan Xu<sup>a,\*</sup>, Magnus Nydén<sup>b</sup> and Mikael Larsson<sup>a,b</sup>

7

8 <sup>a</sup>*Future Industries Institute, University of South Australia, Mawson Lakes, South Australia 5095,*  
9 *Australia.*

10 <sup>b</sup>*School of Energy and Resources, University College London, 220 Victoria Square, Adelaide,*  
11 *South Australia 5000, Australia*

12

13 **\*Corresponding authors:** E-mail: [ivan.kempson@unisa.edu.au](mailto:ivan.kempson@unisa.edu.au)

14 E-mail: [haolan.xu@unisa.edu.au](mailto:haolan.xu@unisa.edu.au)

15

16

17

18

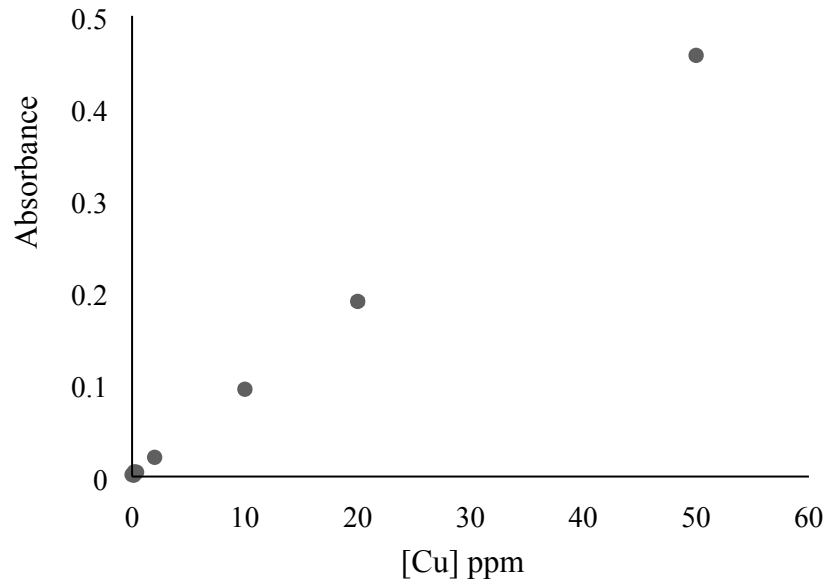

19

20 **Fig. S1** Calibration curve indicating absorbance of  $\text{Cu}^{2+}$ -PEI complex measured at 275 nm  
21 mentioned on the Y-axis for the known concentrations of  $\text{Cu}^{2+}$  in solution mentioned on the X-  
22 axis. Error bars indicate ( $\pm$ ) S.D. between measurements ( $n=3$ ).

23

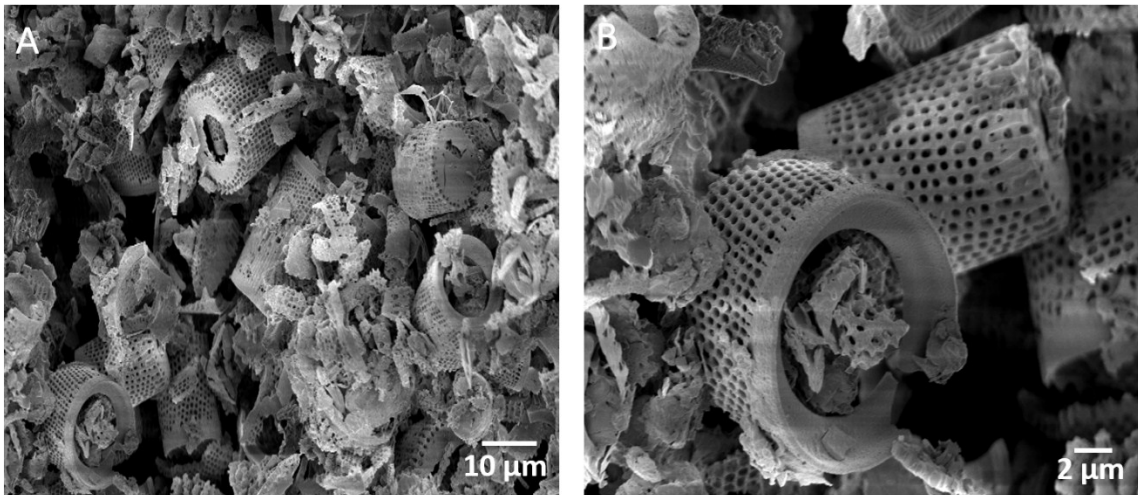

24

25 **Fig. S2** Scanning electron micrographs presenting morphology of DE particles at different length  
26 scales (A) and (B).

27

28

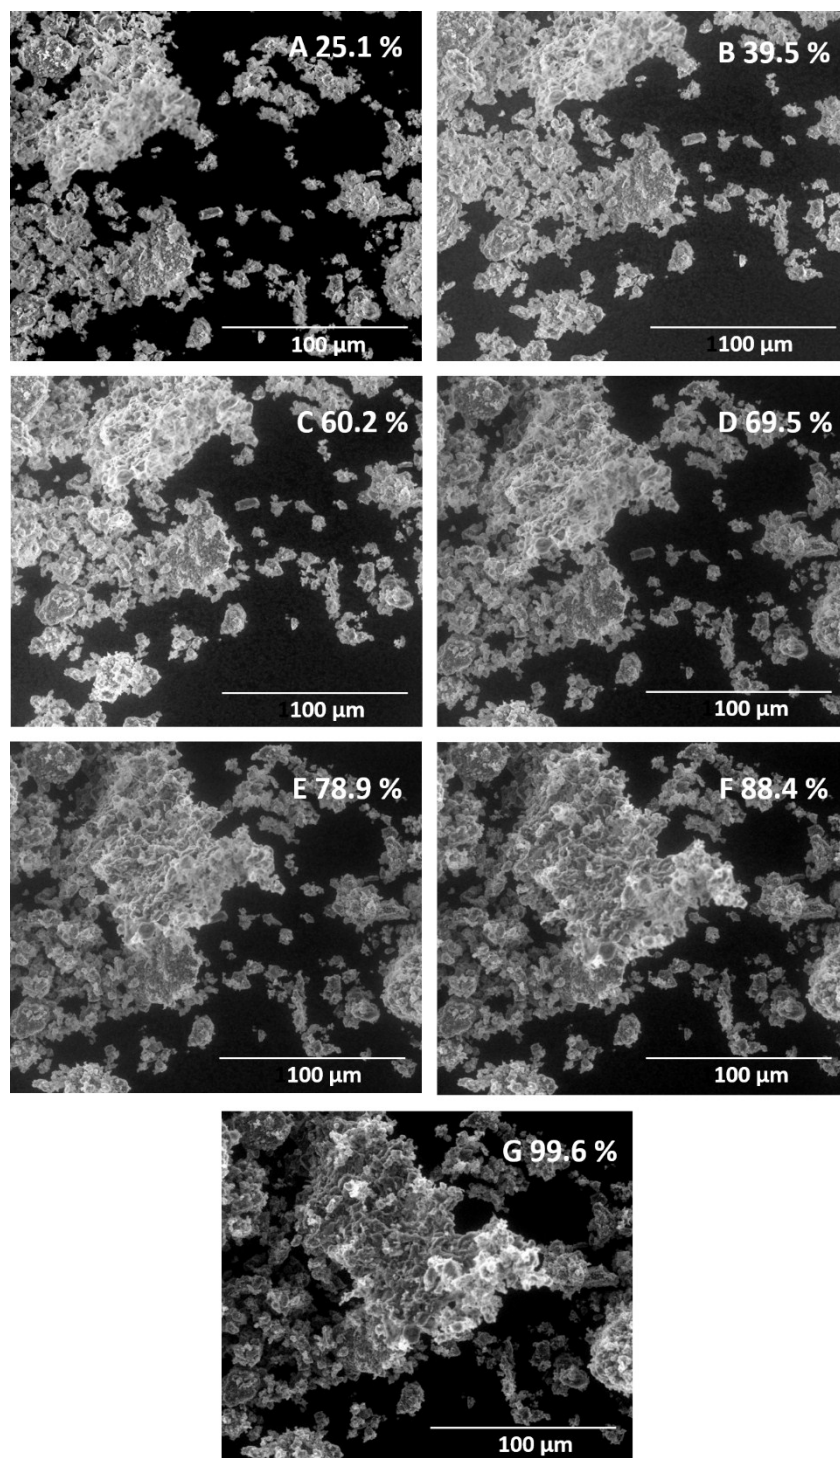

29

30 **Fig. S3** SEM micrographs showing swelling behavior of GA-PEI resin observed using ESEM under  
31 different stages of air moisture % levels indicated.

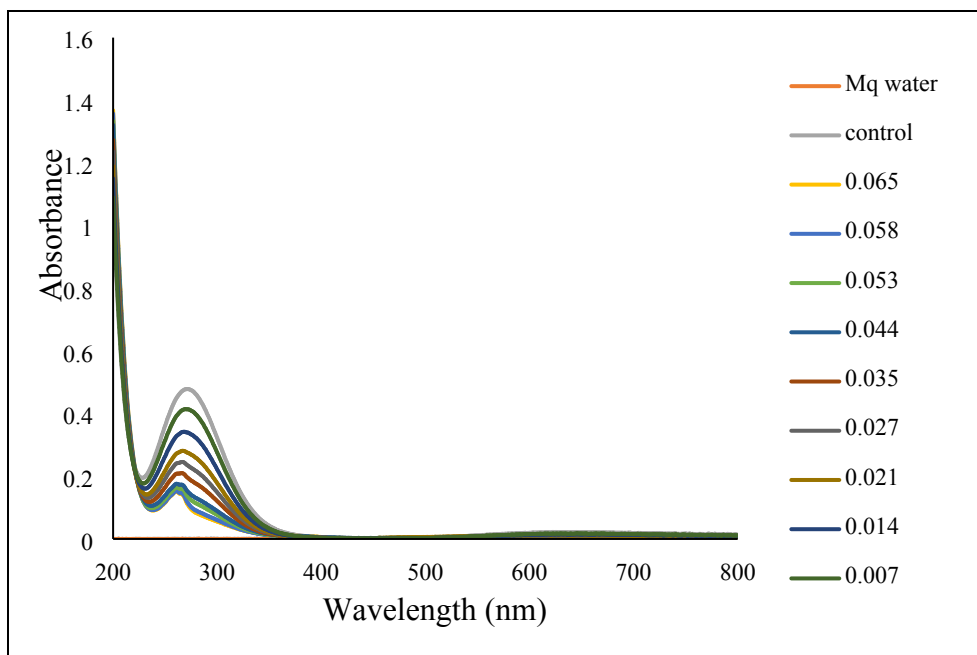

33

34 **Fig. S4** Absorbance spectra for Cu<sup>2+</sup> remaining in solution after absorption by Lewatit TP 220  
 35 resins indicating distortion of peak at 275 nm. The Fig. legends represent amount of particles (g)  
 36 added to 40 ml of solution spiked with 50 mg/L copper ions and control solution refers to the  
 37 solution containing copper ions without resins at pH 4.

38

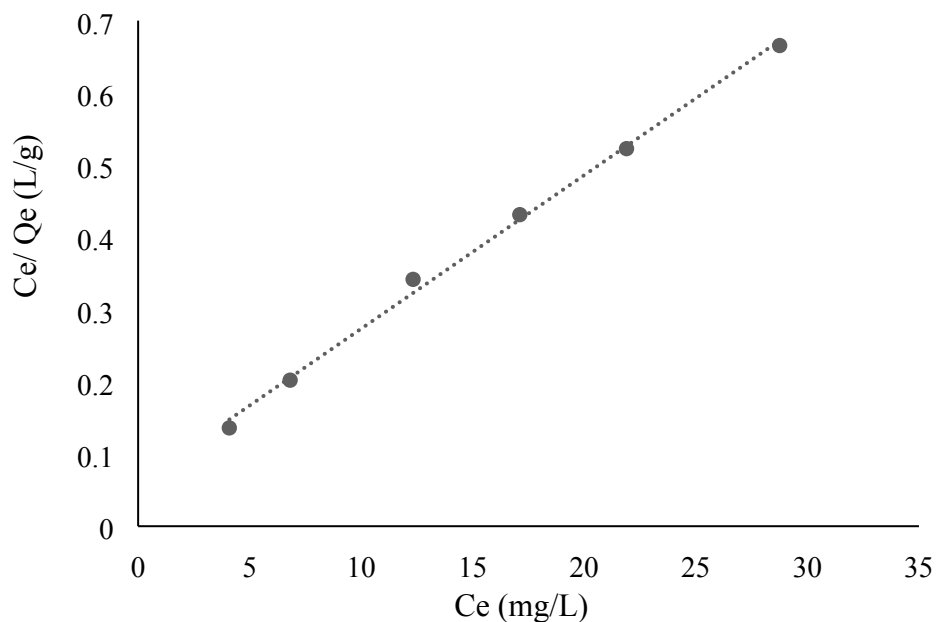

39

40 **Fig. S5** Plot of  $C_e/Q_e$  vs  $C_e$  for the Langmuir model of adsorption for Lewatit TP 220 resins. The  
 41 absorbance of  $Cu^{2+}$ -PEI complex was recorded at 290 nm through UV-Visible spectrophotometer  
 42 and data reported as points.

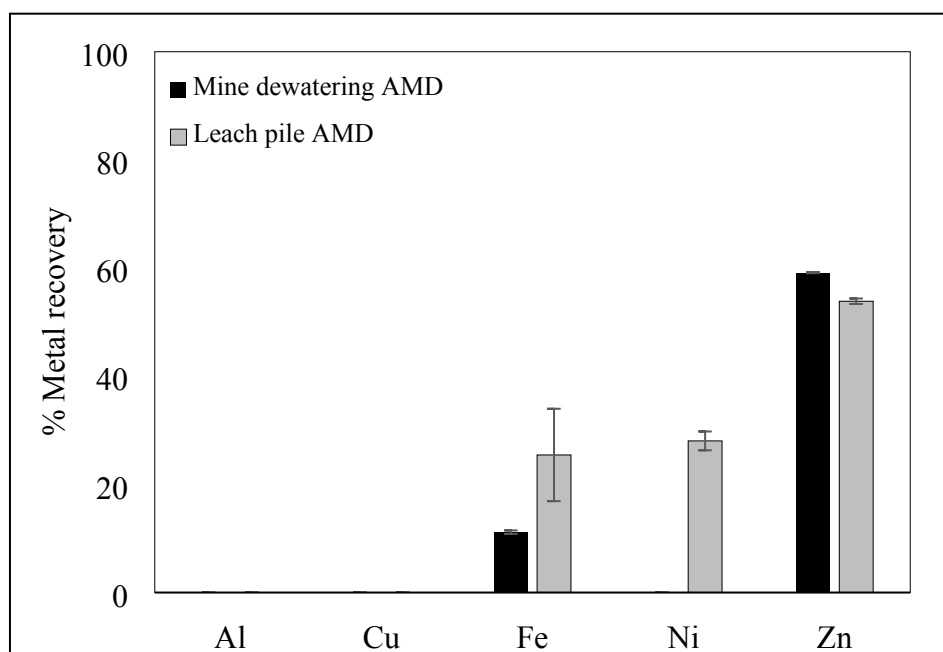

43

44 **Fig. S6** Normalized metal percent recovery in centrifuged solutions of mine dewatering AMD  
 45 (black) and leach pile AMD (grey) post second elution step for Lewatit TP 220 resins. Error bars  
 46 indicate  $\pm$  min/max (n=2).

47

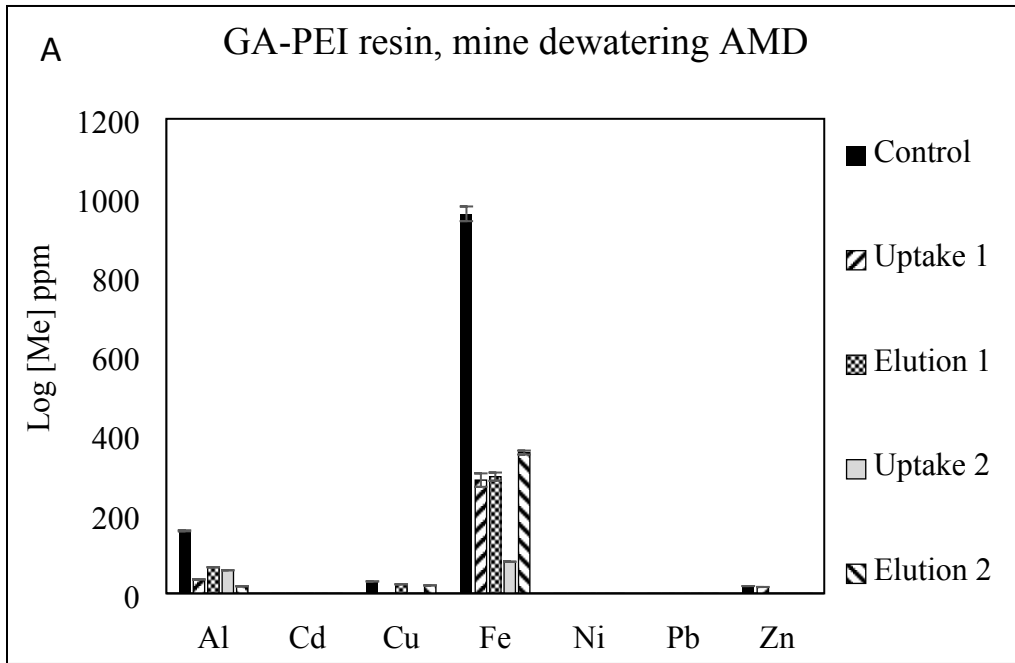

49

50

51

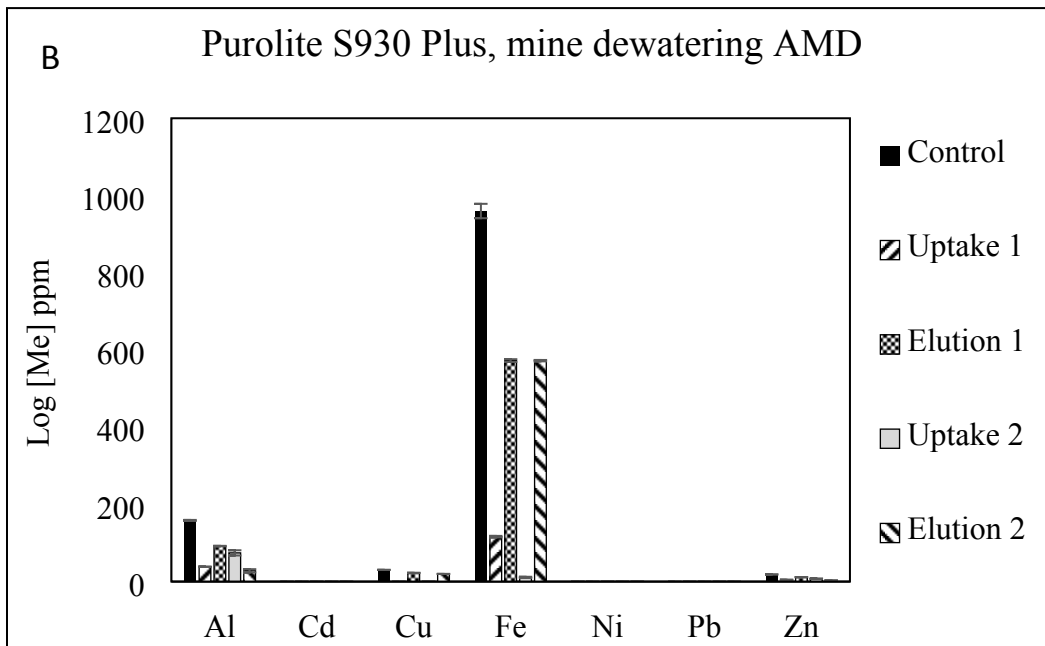

52

53

54

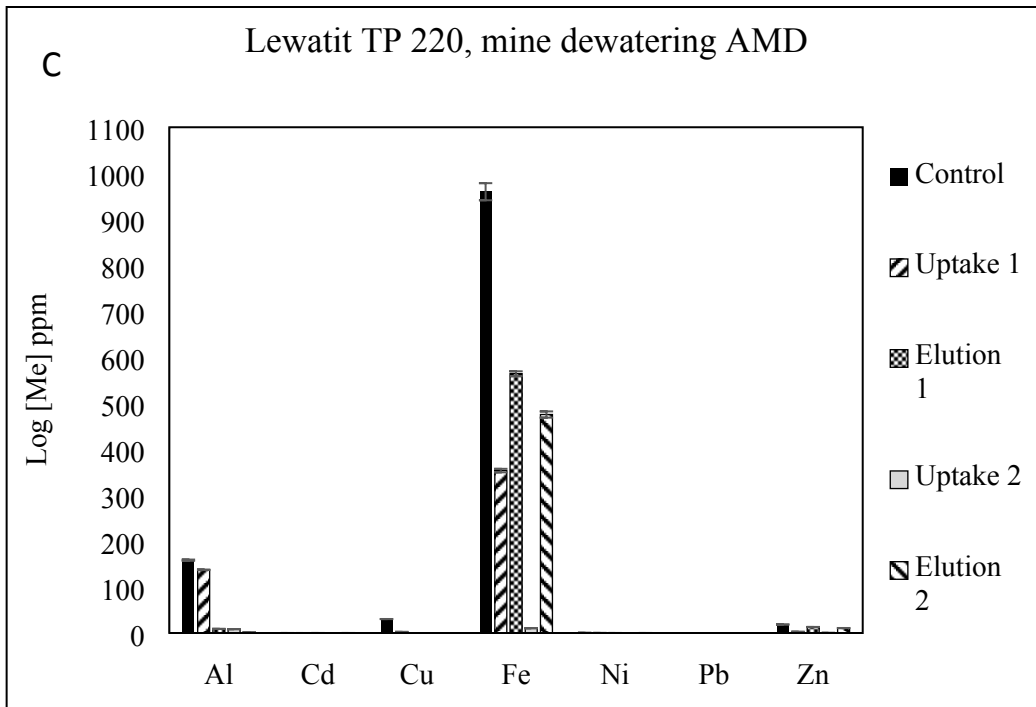

55

56

57

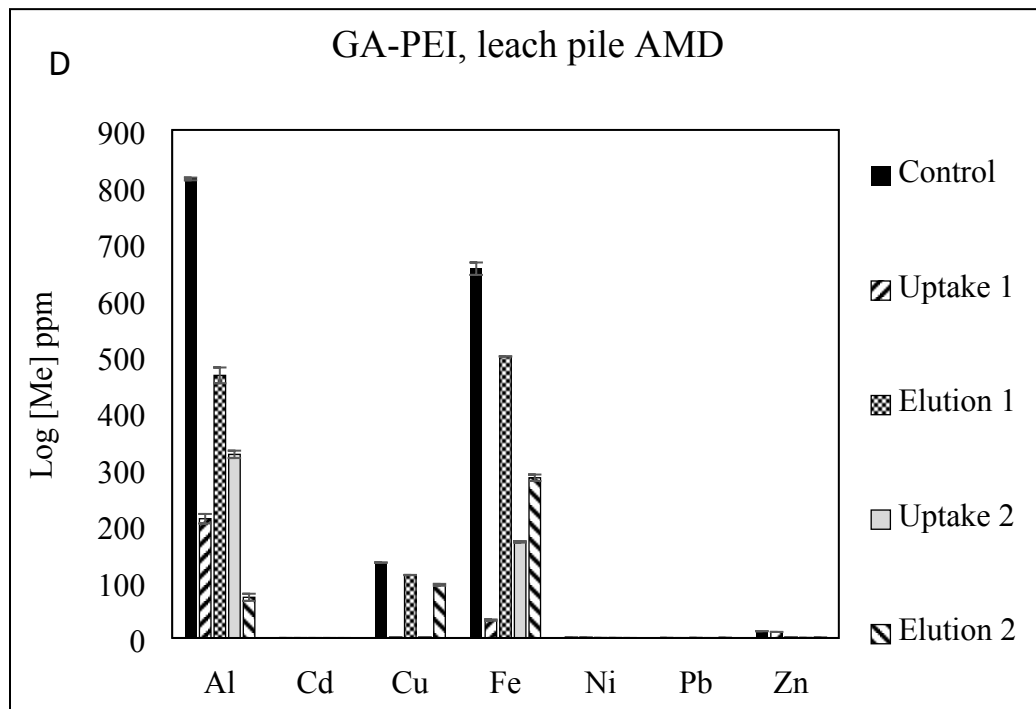

58

59

60

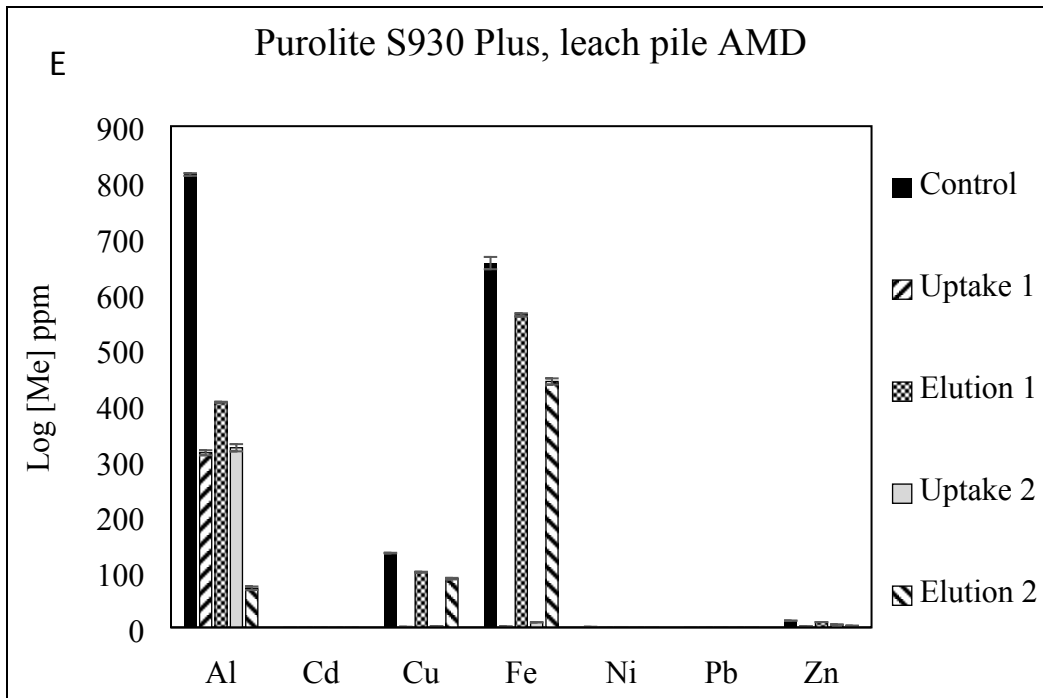

61  
62  
63

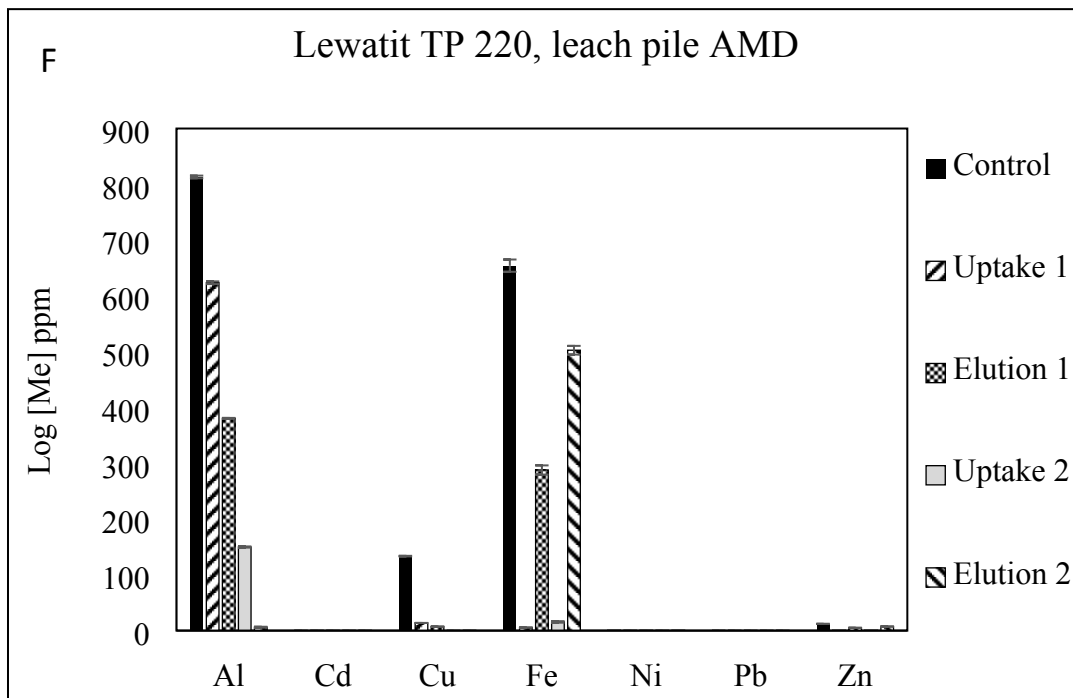

64

65 **Fig. S7** Bar graphs showing concentration of metals remaining in solution following  
66 uptake/elution cycles in non-centrifuged mine dewatering AMD (A-C) and leach pile AMD (D-F)  
67 for all the resins. In legends, control refers to the non-centrifuged MD/LP AMD at pH 4 without  
68 resins. Error bars indicate  $\pm$  min/max (n=2).



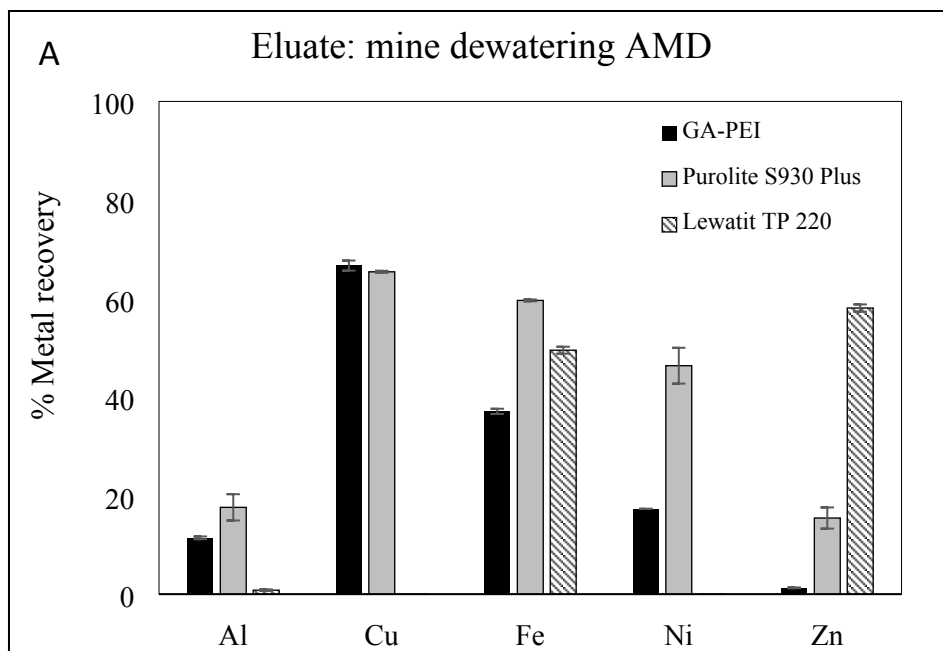

69

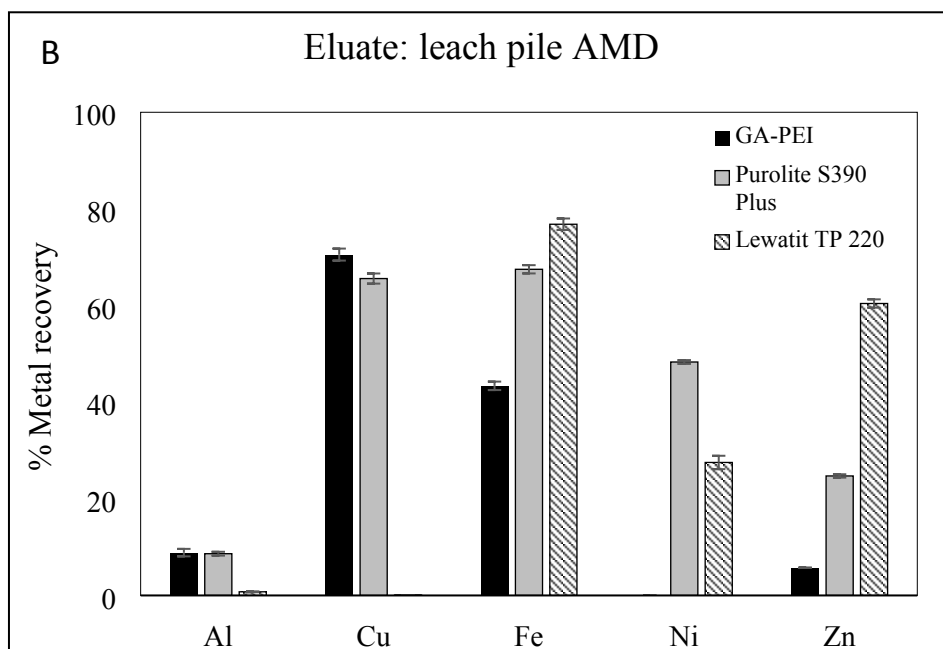

70

71 **Fig. S8** Bar graph showing normalized metal percent recovery in non-centrifuged (a) mine  
 72 dewatering AMD and (b) leach pile AMD post second elution of metals from resins. Error bars  
 73 indicate  $\pm$  min/max (n=2).

74
